# Supplementary material for: Attitudes and Beliefs on Influenza Vaccination during the COVID-19 Pandemic: Results from a Representative Italian Survey
Source: PubMed Central journal article supplement (PMC7712959; doi:10.3390/vaccines8040711), 2020-11-30
Supplement: vaccines-08-00711-s001.pdf [file vaccines-08-00711-s001.pdf]

**Table S1.** Multivariable logistic regression analysis on the association between socioeconomic factors and reluctance to receive the 2020/21 influenza vaccine: sensitivity analysis ( $N = 2,262$ ).

| <b>Variable</b>                                     | <b>Level</b>                 | <b>aOR (95% CI)</b> | <b>P</b> |
|-----------------------------------------------------|------------------------------|---------------------|----------|
| Sex                                                 | Male                         | Ref                 | –        |
|                                                     | Female                       | 0.96 (0.79–1.18)    | .72      |
| Age, years                                          | 1-year increase              | 0.98 (0.97–0.99)    | < .001   |
| 2019/20<br>vaccination                              | Yes                          | Ref                 | –        |
|                                                     | No                           | 0.11 (0.08–0.14)    | < .001   |
| Geographic<br>area                                  | North-East                   | Ref                 | –        |
|                                                     | North-West                   | 1.11 (0.83–1.48)    | .48      |
|                                                     | Center                       | 1.00 (0.73–1.37)    | .98      |
|                                                     | South                        | 0.79 (0.58–1.08)    | .14      |
|                                                     | Islands                      | 1.03 (0.71–1.49)    | .88      |
| Urbanization<br>pattern, <i>N</i> of<br>inhabitants | < 5,000                      | Ref                 | –        |
|                                                     | 5,000–9,999                  | 0.92 (0.63–1.36)    | .69      |
|                                                     | 10,000–29,999                | 0.61 (0.43–0.87)    | .006     |
|                                                     | 30,000–99,999                | 0.71 (0.50–0.99)    | .049     |
|                                                     | 100,000–249,999              | 0.77 (0.51–1.15)    | .20      |
|                                                     | ≥ 250,000                    | 0.56 (0.40–0.79)    | < .001   |
| Employment<br>status                                | Permanently employed         | Ref                 | –        |
|                                                     | Occasionally employed        | 0.78 (0.54–1.15)    | .21      |
|                                                     | Student                      | 0.52 (0.35–0.77)    | .001     |
|                                                     | Housekeeper                  | 0.86 (0.55–1.33)    | .49      |
|                                                     | Unemployed                   | 1.27 (0.89–1.81)    | .19      |
|                                                     | Retired                      | 0.83 (0.56–1.22)    | .33      |
|                                                     | Other                        | 0.66 (0.32–1.34)    | .25      |
| Household<br>pattern                                | Living alone                 | 1.32 (0.92–1.90)    | .13      |
|                                                     | Living with a spouse/partner | 1.04 (0.83–1.31)    | .73      |
|                                                     | Living with ≥ 1 child        | 1.21 (0.97–1.50)    | .092     |
|                                                     | Living with ≥ 1 older adult  | 1.05 (0.65–1.69)    | .85      |
| Perceived<br>economic<br>well-being                 | Low                          | Ref                 | –        |
|                                                     | Lower than average           | 0.60 (0.32–1.12)    | .11      |
|                                                     | Average                      | 0.49 (0.28–0.87)    | .016     |
|                                                     | Higher than average          | 0.47 (0.26–0.83)    | .010     |
|                                                     | High                         | 0.33 (0.15–0.72)    | .006     |
| ISCED<br>educational<br>level                       | 1                            | Ref                 | –        |
|                                                     | 2                            | 0.54 (0.15–1.94)    | .34      |
|                                                     | 3/4                          | 0.65 (0.19–2.23)    | .49      |
|                                                     | 5                            | 0.52 (0.15–1.94)    | .31      |
|                                                     | 6                            | 0.63 (0.19–2.23)    | .54      |
